# Supplementary material for: Ultrafast post-synthetic modification of a pillared cobalt(ii)-based metal–organic framework via sulfurization of its pores for high-performance supercapacitors
Source: Royal Society of Chemistry journal article supplement (doi:10.1039/c9ta01628g), 2019-01-01
Supplement: c9ta01628g1.pdf [file c9ta01628g1.pdf]

**Supporting information for**  
**Ultrafast Post-Synthetic Modification of a Pillared Cobalt(II)-Based**  
**Metal-Organic Framework via Sulfurization of Their Pores for**  
**High-Performance Supercapacitors**

Reza Abazari,<sup>a</sup> Soheila Sanati,<sup>a</sup> Ali Morsali,<sup>a,\*</sup> Alexandra M. Z. Slawin,<sup>b</sup> Cameron L. Carpenter-  
Warren,<sup>b</sup> Wei Chen,<sup>c,d</sup> and Anmin Zheng<sup>c,e</sup>

<sup>a</sup> *Department of Chemistry, Faculty of Basic Sciences, Tarbiat Modares University, Tehran,  
Iran, 14115–175*

<sup>b</sup> *School of Chemistry, University of St Andrews, St Andrews, Fife, UK, KY16 9ST*

<sup>c</sup> *State Key Laboratory of Magnetic Resonance and Atomic and Molecular Physics, Wuhan Institute  
of Physics and Mathematics, the Chinese Academy of Sciences, Wuhan 430071, P. R. China*

<sup>d</sup> *University of Chinese Academy of Sciences, Beijing 100049, P. R. China*

<sup>e</sup> *Wuhan-Oxford Joint Catalysis Laboratory, Wuhan 430071, P. R. China*

---

## **General experimental procedures**

### **Materials and physical techniques**

All starting materials for the synthesis were purchased from commercial providers and used without further purification (Sigma-Aldrich, Merck and the others). The N,N'-bis-(4-pyridylformamide)-1,4-benzenediamine (bpfb) ligand was prepared by following the synthesis steps reported in the work of Sheykhan et al.<sup>1</sup> IR spectra were recorded using a Nicolet Fourier Transform IR, Nicolet 100 spectrometer in the range 400-4000 cm<sup>-1</sup> using the KBr disk technique. The thermal behavior of the samples was analyzed by a PL-STA 1500 apparatus working under a nitrogen atmosphere and at the thermal rate of 10 °C min<sup>-1</sup>. X-ray powder diffraction (PXRD) measurements were performed using a Philips X'pert diffractometer with monochromated Cu-K $\alpha$  ( $\lambda$ =1.54056 Å) radiation. The N<sub>2</sub> adsorption/desorption isotherm was measured at 77 K using a Micromeritics ASAP 2020 analyzer. The specific surface area was calculated by the Brunauer-Emmett-Teller (BET) method. The inductively coupled plasma (ICP) analysis was performed on a Varian ICP-OES VISTA-PRO CCD instrument. A CHNS Thermo Scientific Flash 2000 elemental analyzer was used to analyze elemental contributions to the samples. Finally, melting points were measured on an Electrothermal 9100 apparatus.

### **Collection and reduction of X-ray data**

X-ray diffraction data was collected at 125 K using a Rigaku SCXmini CCD diffractometer with a SHINE monochromator [Mo K $\alpha$  radiation ( $\lambda$  = 0.71075 Å)].

Intensity data were collected using  $\omega$  steps accumulating area detector images spanning at least a hemisphere of reciprocal space. All data were corrected for Lorentz polarization effects. A multiscan absorption correction was applied by using CrysAlisPro<sup>2</sup> Structures were solved by

dual space methods (SHELXT) and refined by full-matrix least-squares against  $F^2$  (SHELXL-2013).<sup>3</sup> Non-hydrogen atoms were refined anisotropically, and hydrogen atoms were refined using a riding model, with the exception of the N-H's, which were refined freely. All calculations were performed using Olex 2.<sup>4</sup> The occupancy of the second DMF molecule was set to 0.5, in order to obtain consistent thermal parameters - the formula reflects this. Selected crystallographic data are presented in Table S1 to S3.

### **Activation method**

TMU-61 was heated for 48 h at 140 °C in a vacuum oven. The framework of TMU-61 conserved its structure after elimination of the guest solvent molecules.

### **Stability of TMU-61**

*Thermostability:* To test the thermal stability of TMU-61, 70 mg of it was heated from 200 to 400 °C using a 50 °C gradient.

*Stability in some solvents:* Chemical stability of TMU-61 was assessed by immersing 70 mg of it in absolute ethanol, water,  $\text{CH}_2\text{Cl}_2$ , *n*-hexane, and acetonitrile for 48 h at 25 °C.

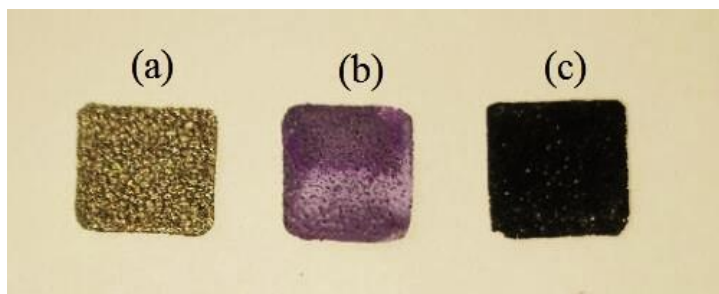

**Figure S1.** Bare of Ni foam (a), TMU-61 coated on Ni foam substrate (b), and S-TMU-61 coated on Ni foam substrate (c).

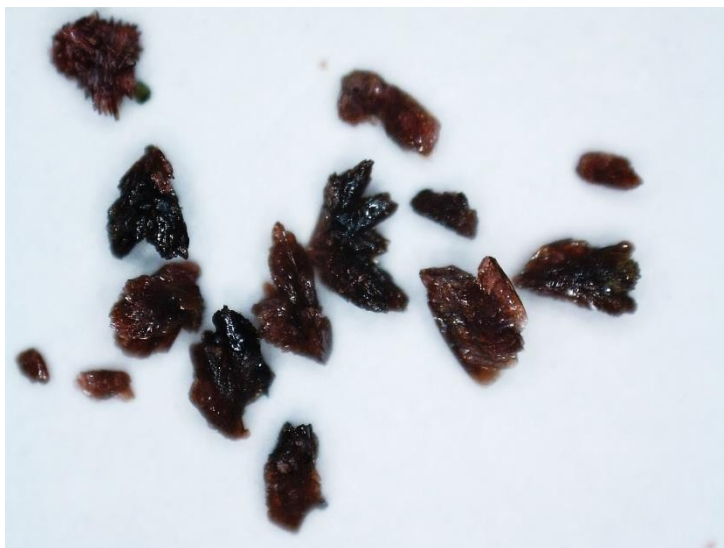

**Figure S2.** Light microscope image of solvated bulk TMU-61 crystals.

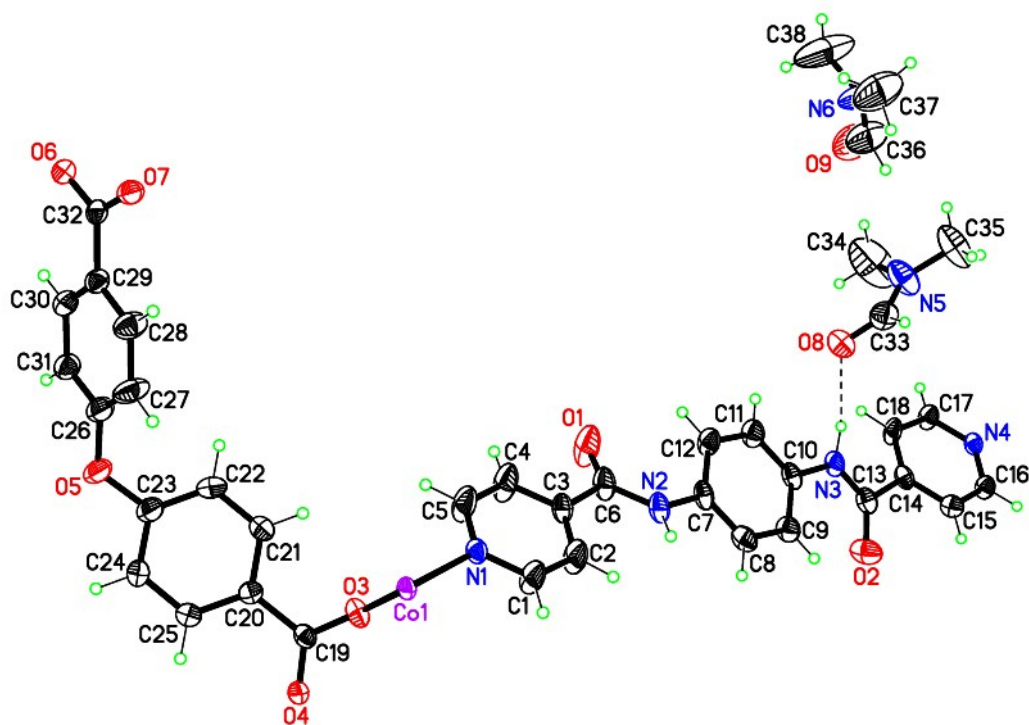

**Figure S3.** The asymmetric unit of TMU-61 with the thermal ellipsoids of non-hydrogen atoms shown at 50% probability and hydrogen atoms drawn as spheres of arbitrary radii.

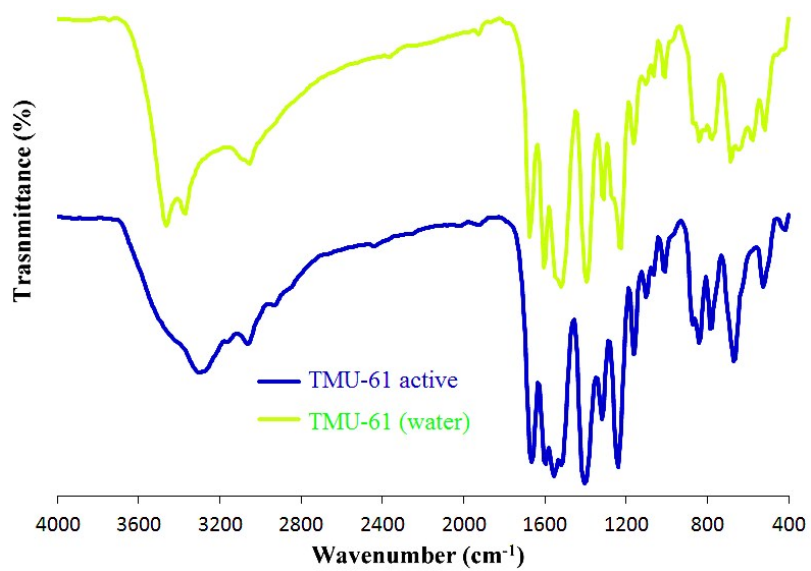

**Figure S4.** The FT-IR spectra of activated TMU-61 before (blue curve) and after 72 h (green curve) immersion into the aqueous solution.

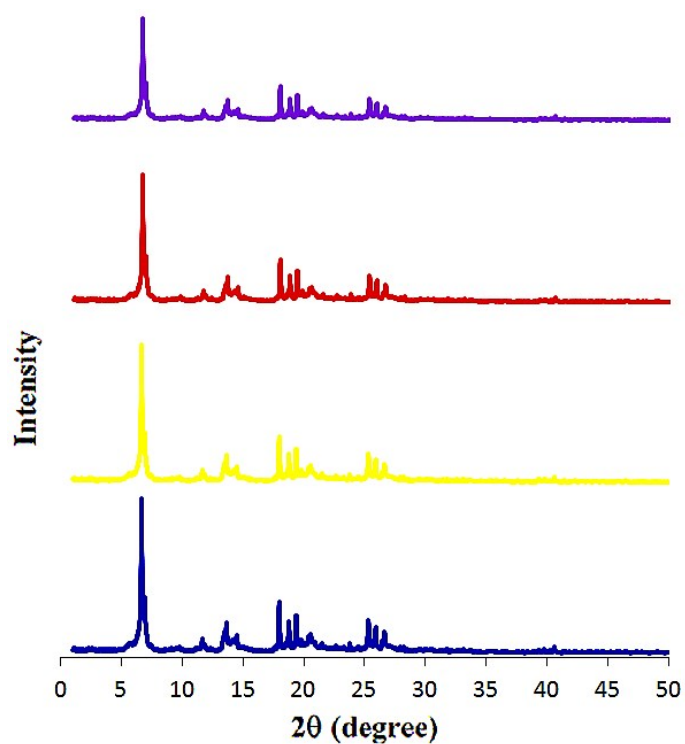

**Figure S5.** The PXRD patterns of the (a) as-synthesized TMU-61 (blue line) and the TMU-61 calcined in air at (b) 200 °C (yellow line), (c) 250 °C (brown line), and (d) 350 °C (purple line).



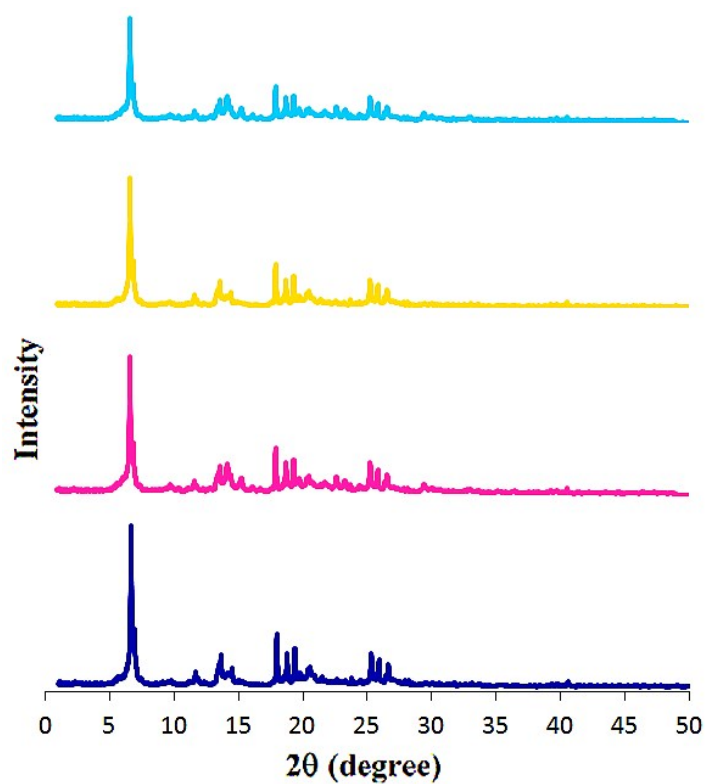

**Figure S6.** The PXRD patterns of the (a) as-synthesized TMU-61 (blue line) and the TMU-61 immersed in (b) absolute ethanol (pink line), (c) acetonitrile (orange line), and (d) water (cyan line).

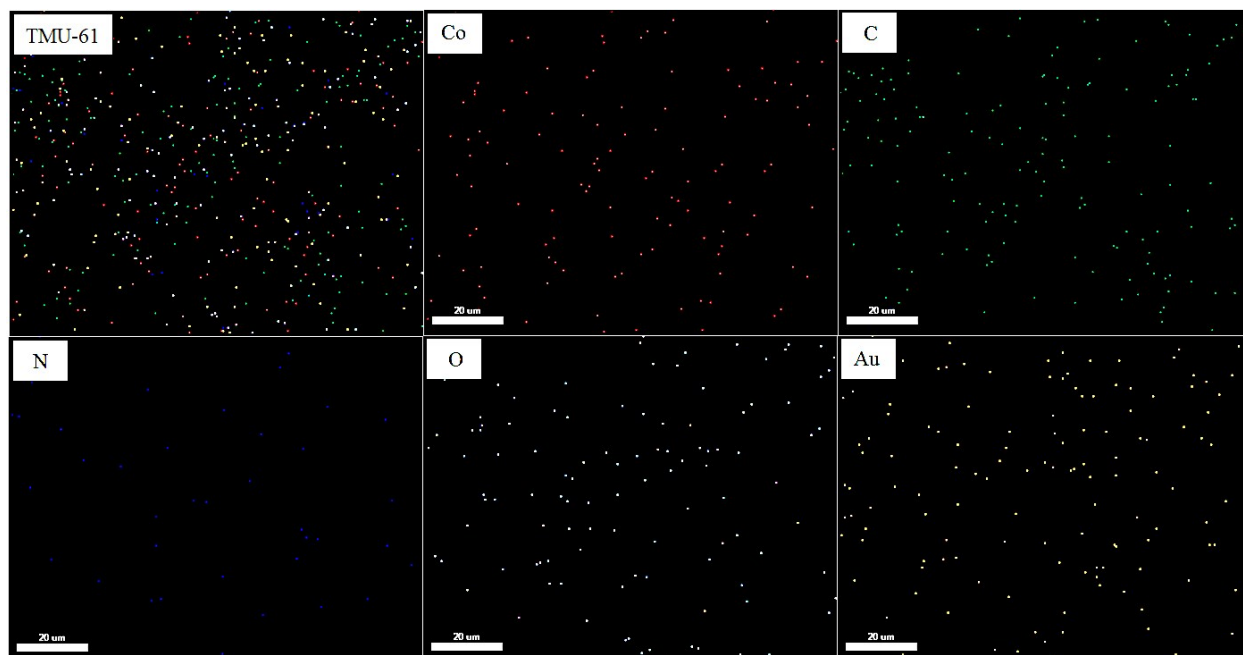

**Figure S7.** The elemental mapping of the TMU-61.

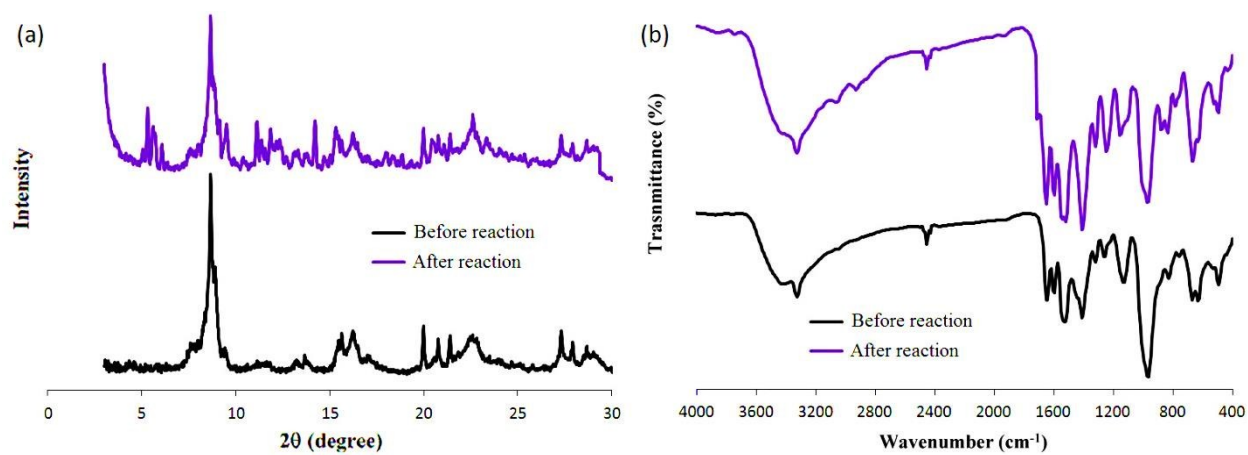

**Figure S8.** The XRD patterns (a) and FT-IR spectra (b) of the S-TMU-61 before and after 6000 cycles.

**Table S1.** Crystal data and structure refinement for TMU-61.

|                                             |                                                                                 |
|---------------------------------------------|---------------------------------------------------------------------------------|
| Identification code                         | TMU-61                                                                          |
| Empirical formula                           | C <sub>73</sub> H <sub>65</sub> Co <sub>2</sub> N <sub>11</sub> O <sub>17</sub> |
| Formula weight                              | 1486.22                                                                         |
| Temperature/K                               | 293(2)                                                                          |
| Crystal system                              | triclinic                                                                       |
| Space group                                 | P-1                                                                             |
| a/Å                                         | 9.8591(11)                                                                      |
| b/Å                                         | 14.9188(15)                                                                     |
| c/Å                                         | 15.0675(13)                                                                     |
| α/°                                         | 112.424(9)                                                                      |
| β/°                                         | 99.484(8)                                                                       |
| γ/°                                         | 106.304(9)                                                                      |
| Volume/Å <sup>3</sup>                       | 1871.7(4)                                                                       |
| Z                                           | 1                                                                               |
| ρ <sub>calc</sub> /g/cm <sup>3</sup>        | 1.319                                                                           |
| μ/mm <sup>-1</sup>                          | 0.517                                                                           |
| F(000)                                      | 770.0                                                                           |
| Crystal size/mm <sup>3</sup>                | 0.2 × 0.14 × 0.06                                                               |
| Radiation                                   | Mo Kα (λ = 0.71073)                                                             |
| 2θ range for data collection/°              | 3.278 to 63.716                                                                 |
| Index ranges                                | -13 ≤ h ≤ 14, -20 ≤ k ≤ 21, -22 ≤ l ≤ 22                                        |
| Reflections collected                       | 23590                                                                           |
| Independent reflections                     | 11685 [R <sub>int</sub> = 0.0722, R <sub>sigma</sub> = 0.1427]                  |
| Data/restraints/parameters                  | 11685/26/499                                                                    |
| Goodness-of-fit on F <sup>2</sup>           | 1.089                                                                           |
| Final R indexes [I ≥ 2σ (I)]                | R <sub>1</sub> = 0.0906, wR <sub>2</sub> = 0.2020                               |
| Final R indexes [all data]                  | R <sub>1</sub> = 0.1750, wR <sub>2</sub> = 0.2382                               |
| Largest diff. peak/hole / e Å <sup>-3</sup> | 0.92/-0.55                                                                      |

**Table S2.** Bond Lengths for TMU-61.

| Atom | Atom             | Length/Å  | Atom | Atom | Length/Å   |
|------|------------------|-----------|------|------|------------|
| Co1  | O3               | 2.007 (3) | C7   | C12  | 1.382 (6)  |
| Co1  | O4 <sup>1</sup>  | 2.053 (3) | C8   | C9   | 1.383 (6)  |
| Co1  | O6 <sup>2</sup>  | 2.257 (3) | C9   | C10  | 1.397 (6)  |
| Co1  | O7 <sup>2</sup>  | 2.133 (3) | C10  | C11  | 1.385 (7)  |
| Co1  | N1               | 2.174 (3) | C11  | C12  | 1.392 (6)  |
| Co1  | N4 <sup>3</sup>  | 2.168 (3) | C13  | C14  | 1.506 (6)  |
| O1   | C6               | 1.222 (6) | C14  | C15  | 1.383 (6)  |
| O2   | C13              | 1.232 (6) | C14  | C18  | 1.388 (6)  |
| O3   | C19              | 1.271 (5) | C15  | C16  | 1.376 (6)  |
| O4   | Co1 <sup>1</sup> | 2.053 (3) | C17  | C18  | 1.390 (6)  |
| O4   | C19              | 1.252 (5) | C19  | C20  | 1.486 (6)  |
| O5   | C23              | 1.390 (6) | C20  | C21  | 1.386 (6)  |
| O5   | C26              | 1.386 (6) | C20  | C25  | 1.385 (6)  |
| O6   | Co1 <sup>2</sup> | 2.257 (3) | C21  | C22  | 1.390 (7)  |
| O6   | C32              | 1.284 (5) | C22  | C23  | 1.379 (7)  |
| O7   | Co1 <sup>2</sup> | 2.133 (3) | C23  | C24  | 1.370 (7)  |
| O7   | C32              | 1.271 (5) | C24  | C25  | 1.387 (7)  |
| N1   | C1               | 1.317 (6) | C26  | C27  | 1.379 (7)  |
| N1   | C5               | 1.321 (6) | C26  | C31  | 1.376 (7)  |
| N2   | C6               | 1.341 (6) | C27  | C28  | 1.396 (7)  |
| N2   | C7               | 1.424 (5) | C28  | C29  | 1.396 (6)  |
| N3   | C10              | 1.419 (5) | C29  | C30  | 1.383 (6)  |
| N3   | C13              | 1.351 (6) | C29  | C32  | 1.481 (6)  |
| N4   | Co1 <sup>4</sup> | 2.168 (3) | C30  | C31  | 1.397 (6)  |
| N4   | C16              | 1.340 (6) | O9   | C36  | 1.151 (17) |
| N4   | C17              | 1.337 (5) | N6   | C36  | 1.293 (18) |
| C1   | C2               | 1.380 (6) | N6   | C37  | 1.385 (18) |
| C2   | C3               | 1.354 (7) | N6   | C38  | 1.451 (18) |
| C3   | C4               | 1.375 (7) | O8   | C33  | 1.232 (6)  |
| C3   | C6               | 1.500 (6) | N5   | C33  | 1.311 (7)  |
| C4   | C5               | 1.388 (7) | N5   | C34  | 1.459 (9)  |
| C7   | C8               | 1.383 (7) | N5   | C35  | 1.444 (8)  |

<sup>1</sup>-X,2-Y,2-Z; <sup>2</sup>-X,2-Y,1-Z; <sup>3</sup>-1+X,1+Y,+Z; <sup>4</sup>1+X,-1+Y,+Z

**Table S3.** Selected bond angles ( $^{\circ}$ ) for TMU-61.

| Atom            | Atom | Atom             | Angle/ $^{\circ}$ | Atom | Atom | Atom | Angle/ $^{\circ}$ |
|-----------------|------|------------------|-------------------|------|------|------|-------------------|
| O3              | Co1  | O4 <sup>1</sup>  | 108.67 (13)       | C10  | C11  | C12  | 121.2 (4)         |
| O3              | Co1  | O6 <sup>2</sup>  | 157.89 (12)       | C7   | C12  | C11  | 119.7 (4)         |
| O3              | Co1  | O7 <sup>2</sup>  | 97.59 (13)        | O2   | C13  | N3   | 123.8 (4)         |
| O3              | Co1  | N1               | 85.35 (13)        | O2   | C13  | C14  | 119.3 (4)         |
| O3              | Co1  | N4 <sup>3</sup>  | 92.69 (13)        | N3   | C13  | C14  | 116.9 (4)         |
| O4 <sup>1</sup> | Co1  | O6 <sup>2</sup>  | 92.84 (12)        | C15  | C14  | C13  | 117.5 (4)         |
| O4 <sup>1</sup> | Co1  | O7 <sup>2</sup>  | 152.85 (12)       | C15  | C14  | C18  | 118.0 (4)         |
| O4 <sup>1</sup> | Co1  | N1               | 87.55 (12)        | C18  | C14  | C13  | 124.5 (4)         |
| O4 <sup>1</sup> | Co1  | N4 <sup>3</sup>  | 95.62 (13)        | C16  | C15  | C14  | 119.4 (4)         |
| O7 <sup>2</sup> | Co1  | O6 <sup>2</sup>  | 60.49 (11)        | N4   | C16  | C15  | 123.7 (4)         |
| O7 <sup>2</sup> | Co1  | N1               | 87.80 (13)        | N4   | C17  | C18  | 123.9 (4)         |
| O7 <sup>2</sup> | Co1  | N4 <sup>3</sup>  | 89.81 (13)        | C14  | C18  | C17  | 118.5 (4)         |
| N1              | Co1  | O6 <sup>2</sup>  | 90.63 (12)        | O3   | C19  | C20  | 117.6 (4)         |
| N4 <sup>3</sup> | Co1  | O6 <sup>2</sup>  | 90.19 (12)        | O4   | C19  | O3   | 122.9 (4)         |
| N4 <sup>3</sup> | Co1  | N1               | 176.69 (14)       | O4   | C19  | C20  | 119.6 (4)         |
| C19             | O3   | Co1              | 141.5 (3)         | C21  | C20  | C19  | 119.6 (4)         |
| C19             | O4   | Co1 <sup>1</sup> | 125.2 (3)         | C25  | C20  | C19  | 121.2 (4)         |
| C26             | O5   | C23              | 119.2 (4)         | C25  | C20  | C21  | 119.1 (4)         |
| C32             | O6   | Co1 <sup>2</sup> | 86.7 (2)          | C20  | C21  | C22  | 120.1 (4)         |
| C32             | O7   | Co1 <sup>2</sup> | 92.6 (2)          | C23  | C22  | C21  | 119.9 (4)         |
| C1              | N1   | Co1              | 121.6 (3)         | C22  | C23  | O5   | 122.9 (4)         |
| C1              | N1   | C5               | 115.7 (4)         | C24  | C23  | O5   | 116.7 (4)         |
| C5              | N1   | Co1              | 122.7 (3)         | C24  | C23  | C22  | 120.3 (4)         |
| C6              | N2   | C7               | 127.1 (4)         | C23  | C24  | C25  | 119.9 (5)         |
| C13             | N3   | C10              | 127.2 (4)         | C20  | C25  | C24  | 120.6 (4)         |
| C16             | N4   | Co1 <sup>4</sup> | 123.4 (3)         | C27  | C26  | O5   | 122.9 (4)         |
| C17             | N4   | Co1 <sup>4</sup> | 120.1 (3)         | C31  | C26  | O5   | 116.3 (4)         |
| C17             | N4   | C16              | 116.5 (4)         | C31  | C26  | C27  | 120.6 (4)         |
| N1              | C1   | C2               | 124.3 (5)         | C26  | C27  | C28  | 119.1 (5)         |
| C3              | C2   | C1               | 120.4 (5)         | C29  | C28  | C27  | 121.1 (5)         |
| C2              | C3   | C4               | 116.0 (4)         | C28  | C29  | C32  | 119.0 (4)         |
| C2              | C3   | C6               | 124.4 (4)         | C30  | C29  | C28  | 118.8 (4)         |
| C4              | C3   | C6               | 119.6 (4)         | C30  | C29  | C32  | 122.2 (4)         |
| C3              | C4   | C5               | 120.2 (5)         | C29  | C30  | C31  | 120.2 (4)         |
| N1              | C5   | C4               | 123.4 (5)         | C26  | C31  | C30  | 120.2 (4)         |
| O1              | C6   | N2               | 124.2 (4)         | O6   | C32  | C29  | 120.8 (4)         |
| O1              | C6   | C3               | 120.1 (4)         | O7   | C32  | O6   | 120.0 (4)         |
| N2              | C6   | C3               | 115.7 (4)         | O7   | C32  | C29  | 119.2 (4)         |
| C8              | C7   | N2               | 117.7 (4)         | C36  | N6   | C37  | 132.1 (12)        |

|     |     |     |           |     |     |     |            |
|-----|-----|-----|-----------|-----|-----|-----|------------|
| C12 | C7  | N2  | 122.8 (4) | C36 | N6  | C38 | 111.0 (13) |
| C12 | C7  | C8  | 119.4 (4) | C37 | N6  | C38 | 115.9 (12) |
| C7  | C8  | C9  | 121.1 (4) | O9  | C36 | N6  | 133.5 (15) |
| C8  | C9  | C10 | 119.9 (4) | C33 | N5  | C34 | 120.8 (6)  |
| C9  | C10 | N3  | 123.1 (4) | C33 | N5  | C35 | 123.4 (5)  |
| C11 | C10 | N3  | 118.2 (4) | C35 | N5  | C34 | 115.7 (6)  |
| C11 | C10 | C9  | 118.7 (4) | O8  | C33 | N5  | 125.6 (5)  |

<sup>1</sup>-X,2-Y,2-Z; <sup>2</sup>-X,2-Y,1-Z; <sup>3</sup>-1+X,1+Y,+Z; <sup>4</sup>1+X,-1+Y,+Z

**Table S4.** Hydrogen bonding information for TMU-61.

| <b>D H A</b>        | <b>d(D-H)/Å</b> | <b>d(H-A)/Å</b> | <b>d(D-A)/Å</b> | <b>D-H-A/°</b> |
|---------------------|-----------------|-----------------|-----------------|----------------|
| N2H2O6 <sup>1</sup> | 0.91 (4)        | 2.11 (4)        | 3.003 (5)       | 167 (5)        |
| N3H3O8              | 0.94 (4)        | 1.98 (4)        | 2.888 (6)       | 164 (6)        |

<sup>1</sup>1+X,+Y,1+Z

## REFERENCES

- 1 M. Sheykhan, Z.R. Ranjbar, A. Morsali, A. Heydari, *Green Chem.*, 2012, **14**, 1971.
- 2 *CrysAlisPro* v1.171.38.41. Rigaku Oxford Diffraction, Rigaku Corporation, Oxford, U.K. 2015.
- 3 G. M. Sheldrick, *Acta Crystallogr., Sect. A*. 2015, **71**, 3.
- 4 O.V. Dolomanov, L.J. Bourhis, R.J. Gildea, J.A.K. Howard, H. Puschmann, *J. Appl. Cryst.* 2009, **42**, 339.
